# Supplementary material for: The Use of Ropivacaine in Therapeutic Treatment of Oral Aphthosis
Source: Biomed Res Int. 2018 Mar 11;2018:1868254. doi: 10.1155/2018/1868254 (PMC5866890; doi:10.1155/2018/1868254)
Supplement: Supplementary Materials — Table of patients: 80 patients subdivided into 8 groups. In every patient we studied the effect of the aphthae on the quality of life. In every aphthae event we studied pain, difficulty in eating, difficulty in swallowing, and difficulty in producing sounds or speech. With each group we considered the number of relapses that each patient had, the type of aphtha on each patient, and where these aphthae were found in the oral cavity. We formed the following groups: placebo group (P), anaesthetic group (A), pharmaceutical drugs group (M), vitamin group (V), vitamin + local anaesthetic + pharmaceutical drugs (VAM), vitamin + pharmaceutical drugs (VM), anaesthetic + pharmaceutical drugs (AM), and anaesthetic vitamin group (AV). [file 1868254.f1.xlsx]

## Sheet: Risposte del modulo 1
Informazioni cronologiche	Group	Patients	Sex	Age	Relapse	Localization	Recidive	Lenght in days for episode	Pain	Eating Difficulties	Odynophagia	Speek Difficulties
2016-08-02 08:55:22	P	A M	F	25	5	Single	1	10	5	5	2	5
2016-08-02 08:56:18	P		F		5	Multiple	2	9	5	5	4	4
2016-08-02 08:57:13	P				5	Multiple	3	10	4	3	4	2
2016-08-02 08:58:03	P				5	Multiple	4	11	5	5	3	2
2016-08-02 08:59:25	P				5	Multiple	5	10	5	4	5	3
2016-08-02 09:00:16	P	C C	F	38	4	Multiple	1	9	4	2	4	2
2016-08-02 09:01:05	P				4	Single	2	11	5	5	4	3
2016-08-02 09:03:58	P				4	Multiple	3	8	5	2	5	2
2016-08-02 09:05:25	P				4	Single	4	9	5	2	5	3
2016-08-02 09:06:23	P	O B	M	41	5	Multiple	1	12	5	3	5	3
2016-08-02 09:07:20	P				5	Multiple	2	11	4	3	4	3
2016-08-02 09:15:14	P				5	Multiple	3	13	4	4	3	3
2016-08-02 09:16:14	P				5	Multiple	4	11	5	3	5	4
2016-08-02 09:17:16	P				5	Multiple	5	9	5	2	5	4
2016-08-02 09:18:14	P	AM V	M	26	3	Multiple	1	10	5	3	5	2
2016-08-02 09:19:10	P				3	Multiple	2	8	4	4	3	2
2016-08-02 09:28:17	P				3	Multiple	3	10	5	4	5	3
2016-08-02 16:17:16	P	MG L	F	28	5	Multiple	1	9	5	3	5	2
2016-08-02 16:19:25	P				5	Single	2	11	4	3	4	2
2016-08-02 16:20:32	P				5	Multiple	3	10	4	4	3	3
2016-08-02 16:21:34	P				5	Single	4	10	4	2	4	3
2016-08-03 09:35:18	P				5	Multiple	5	8	5	3	5	2
2016-08-03 09:36:27	P	S G	M	33	4	Single	1	9	4	4	2	2
2016-08-03 09:37:33	P				4	Single	2	9	4	4	3	1
2016-08-03 09:38:27	P				4	Multiple	3	12	5	5	3	1
2016-08-03 09:39:38	P				4	Single	4	9	4	3	4	1
2016-08-03 09:44:14	P	P R	M	36	6	Single	1	12	4	2	4	2
2016-08-04 09:44:15	P				6	Single	2	11	5	5	4	3
2016-08-05 09:44:15	P				6	Multiple	3	11	5	3	5	2
2016-08-06 09:44:15	P				6	Multiple	4	13	5	5	5	2
2016-08-07 09:44:15	P				6	Multiple	5	10	5	5	5	3
2016-08-08 09:44:15	P				6	Multiple	6	11	5	5	3	3
2016-08-09 09:44:15	P	C S	M	23	4	Single	1	9	5	5	3	2
2016-08-10 09:44:15	P				4	Multiple	2	10	5	3	5	2
2016-08-11 09:44:15	P				4	Multiple	3	11	5	3	5	3
2016-08-12 09:44:15	P				4	Single	4	9	5	2	5	2
2016-08-13 09:44:15	P	A R	M	29	5	Multiple	1	11	5	4	5	1
2016-08-14 09:44:15	P				5	Single	2	8	4	2	4	1
2016-08-15 09:44:15	P				5	Multiple	3	10	5	3	5	3
2016-08-16 09:44:15	P				5	Multiple	4	10	4	3	4	3
2016-08-17 09:44:15	P				5	Multiple	5	11	4	3	4	2
2016-08-18 09:44:15	P	M R	M	39	6	Multiple	1	9	5	3	5	3
2016-08-19 09:44:15	P				6	Multiple	2	12	5	5	4	3
2016-08-20 09:44:15	P				6	Multiple	3	11	5	3	5	2
2016-08-21 09:44:15	P				6	Multiple	4	13	5	5	3	3
2016-08-01 08:33:14	P				6	Multiple	5	12	5	4	5	3
2016-08-02 08:33:14	P				6	Multiple	6	10	5	3	5	4
2016-08-03 08:33:14	P				6	Multiple	7	10	5	5	3	2
2016-08-04 08:33:14	A	T T	M	23	4	Multiple	1	7	3	3	2	1
2016-08-05 08:33:14	A				4	Single	2	9	2	1	1	1
2016-08-06 08:33:14	A				4	Single	3	9	2	2	1	2
2016-08-07 08:33:14	A				4	Multiple	4	8	2	1	2	1
2016-08-08 08:33:14	A	A V	F	35	3	Single	1	8	3	3	3	3
2016-08-09 08:33:14	A				3	Multiple	2	10	2	2	2	2
2016-08-10 08:33:14	A				3	Multiple	3	8	2	1	2	2
2016-08-11 08:33:14	A	G G	M	47	7	Multiple	1	7	2	2	2	1
2016-08-12 08:33:14	A				7	Single	2	8	2	1	2	1
2016-08-13 08:33:14	A				7	Multiple	3	10	3	1	3	2
2016-08-14 08:33:14	A				7	Multiple	4	7	2	2	2	1
2016-08-15 08:33:14	A				7	Multiple	5	9	3	2	3	2
2016-08-16 08:33:14	A				7	Single	6	8	2	2	2	1
2016-08-17 08:33:14	A				7	Multiple	7	9	3	2	3	1
2016-08-18 08:33:14	A	T F	M	55	3	Single	1	7	3	3	2	1
2016-08-19 08:33:14	A				3	Single	2	6	2	2	2	1
2016-08-20 08:33:14	A				3	Single	3	9	2	2	2	2
2016-08-21 08:33:14	A	S L	F	45	4	Single	1	8	3	3	2	1
2016-08-22 08:33:14	A				4	Multiple	2	9	2	1	2	1
2016-08-23 08:33:14	A				4	Single	3	7	2	2	2	2
2016-08-24 08:33:14	A				4	Single	4	9	2	1	2	1
2016-08-25 08:33:14	A	S M	F	53	5	Single	1	8	3	2	3	2
2016-08-26 08:33:14	A				5	Multiple	2	10	3	3	2	1
2016-08-27 08:33:14	A				5	Multiple	3	10	2	2	2	1
2016-08-28 08:33:14	A				5	Single	4	6	2	2	2	1
2016-08-29 08:33:14	A				5	Multiple	5	11	3	1	3	1
2016-08-30 08:33:14	A	P I	M	59	4	Multiple	1	10	2	2	2	2
2016-08-31 08:33:14	A				4	Multiple	2	9	3	2	3	2
2016-09-01 08:33:14	A				4	Multiple	3	12	2	1	2	2
2016-09-02 08:33:14	A				4	Multiple	4	10	3	3	2	1
2016-09-03 08:33:14	A	R P	M	63	7	Multiple	1	9	3	3	3	2
2016-09-04 08:33:14	A				7	Single	2	8	2	1	2	2
2016-09-05 08:33:14	A				7	Single	3	9	2	1	2	2
2016-09-06 08:33:14	A				7	Multiple	4	14	3	3	2	1
2016-09-07 08:33:14	A				7	Multiple	5	12	2	2	2	1
2016-09-08 08:33:14	A				7	Single	6	8	2	2	2	2
2016-09-09 08:33:14	A				7	Multiple	7	10	3	3	2	1
2016-09-10 08:33:14	A	A F	F	42	4	Multiple	1	12	2	2	2	2
2016-09-11 08:33:14	A				4	Multiple	2	12	3	1	3	2
2016-09-12 08:33:14	A				4	Single	3	8	2	2	2	2
2016-09-13 08:33:14	A				4	Multiple	4	9	3	1	2	3
2016-09-14 08:33:14	A	C A	M	50	4	Single	1	7	2	2	2	1
2016-09-15 08:33:14	A				4	Single	2	8	2	1	2	2
2016-09-16 08:33:14	A				4	Multiple	3	9	3	2	3	1
2016-09-17 08:33:14	A				4	Single	4	8	2	2	2	1
2016-08-01 18:37:14	M	O A	M	42	5	Single	1	8	4	3	4	3
2016-08-02 18:37:14	M				5	Multiple	2	7	5	3	5	2
2016-08-03 18:37:14	M				5	Multiple	3	8	5	5	3	3
2016-08-04 18:37:14	M				5	Single	4	6	4	2	4	2
2016-08-05 18:37:14	M				5	Multiple	5	9	4	3	4	3
2016-08-06 18:37:14	M	L S	M	51	4	Multiple	1	7	5	3	5	2
2016-08-07 18:37:14	M				4	Multiple	2	8	3	2	1	3
2016-08-08 18:37:14	M				4	Multiple	3	7	4	3	4	2
2016-08-09 18:37:14	M				4	Multiple	4	7	5	3	5	2
2016-08-10 18:37:14	M	C B	F	35	5	Multiple	1	8	4	2	3	1
2016-08-11 18:37:14	M				5	Single	2	5	3	1	3	2
2016-08-12 18:37:14	M				5	Multiple	3	7	4	4	3	2
2016-08-13 18:37:14	M				5	Multiple	4	7	4	1	4	3
2016-08-14 18:37:14	M				5	Multiple	5	8	4	4	1	2
2016-08-15 18:37:14	M	R C	M	22	5	Single	1	7	3	1	3	2
2016-08-16 18:37:14	M				5	Multiple	2	8	4	2	4	1
2016-08-17 18:37:14	M				5	Multiple	3	8	4	4	3	2
2016-08-18 18:37:14	M				5	Multiple	4	7	3	2	3	2
2016-08-19 18:37:14	M				5	Multiple	5	7	4	4	3	1
2016-08-20 18:37:14	M	A S	M	51	4	Single	1	7	3	2	3	1
2016-08-21 18:37:14	M				4	Single	2	6	4	1	4	2
2016-08-22 18:37:14	M				4	Single	3	7	3	3	2	1
2016-08-23 18:37:14	M				4	Single	4	7	3	1	3	2
2016-08-24 18:37:14	M	L F	F	33	5	Single	1	5	4	2	4	1
2016-08-25 18:37:14	M				5	Multiple	2	7	5	3	5	2
2016-08-26 18:37:14	M				5	Multiple	3	8	4	4	2	2
2016-08-27 18:37:14	M				5	Single	4	6	4	4	2	1
2016-08-28 18:37:14	M				5	Single	5	6	3	2	3	1
2016-08-29 18:37:14	M	F L	M	37	6	Single	1	5	3	3	1	2
2016-08-30 18:37:14	M				6	Single	2	6	3	1	3	1
2016-08-31 18:37:14	M				6	Single	3	6	4	1	4	2
2016-09-01 18:37:14	M				6	Single	4	7	3	2	3	1
2016-09-02 18:37:14	M				6	Multiple	5	8	4	2	4	1
2016-09-03 18:37:14	M				6	Single	6	5	3	3	1	1
2016-09-04 18:37:14	M	R M	F	28	7	Single	1	6	4	2	4	2
2016-09-05 18:37:14	M				7	Single	2	5	4	2	4	2
2016-09-06 18:37:14	M				7	Single	3	7	5	5	2	1
2016-09-07 18:37:14	M				7	Multiple	4	8	4	3	4	2
2016-09-08 18:37:14	M				7	Multiple	5	9	5	3	5	3
2016-09-09 18:37:14	M				7	Single	6	6	4	4	3	2
2016-09-10 18:37:14	M				7	Multiple	7	8	5	5	4	4
2016-09-11 18:37:14	M	G G	M	64	3	Multiple	1	9	5	4	5	2
2016-09-12 18:37:14	M				3	Multiple	2	10	5	5	5	3
2016-09-13 18:37:14	M				3	Multiple	3	9	5	4	5	2
2016-09-14 18:37:14	M	N B	M	43	6	Multiple	1	8	5	3	5	2
2016-09-15 18:37:14	M				6	Multiple	2	9	5	5	3	1
2016-09-16 18:37:14	M				6	Multiple	3	9	4	4	2	2
2016-09-17 18:37:14	M				6	Single	4	6	4	4	2	2
2016-09-18 18:37:14	M				6	Single	5	7	4	4	3	1
2016-09-19 18:37:14	M				6	Multiple	6	10	5	3	5	1
2016-07-20 20:41:14	V	A W	F	25	5	Multiple	1	7	5	3	5	3
2016-07-21 20:41:14	V				5	Multiple	2	6	5	5	3	2
2016-07-22 20:41:14	V				5	Multiple	3	7	5	5	2	2
2016-07-23 20:41:14	V				5	Single	4	6	4	4	3	1
2016-07-24 20:41:14	V				5	Single	5	8	4	4	2	1
2016-07-25 20:41:14	V	G B	M	52	4	Multiple	1	6	5	5	2	1
2016-07-26 20:41:14	V				4	Multiple	2	6	4	3	4	2
2016-07-27 20:41:14	V				4	Single	3	5	5	3	5	2
2016-07-28 20:41:14	V				4	Single	4	7	4	2	4	2
2016-07-29 20:41:14	V	S M	F	36	5	Multiple	1	6	5	5	2	3
2016-07-30 20:41:14	V				5	Multiple	2	6	4	4	2	3
2016-07-31 20:41:14	V				5	Single	3	7	3	3	2	2
2016-08-01 20:41:14	V				5	Single	4	5	3	3	1	2
2016-08-02 20:41:14	V				5	Multiple	5	6	5	5	3	1
2016-08-03 20:41:14	V	P C	M	32	7	Single	1	5	4	4	3	1
2016-08-04 20:41:14	V				7	Multiple	2	6	4	2	4	2
2016-08-05 20:41:14	V				7	Single	3	6	4	3	4	2
2016-08-06 20:41:14	V				7	Multiple	4	7	5	2	5	3
2016-08-07 20:41:14	V				7	Single	5	7	4	2	4	2
2016-08-08 20:41:14	V				7	Single	6	7	3	3	3	1
2016-08-09 20:41:14	V				7	Single	7	6	4	4	2	1
2016-08-10 20:41:14	V	O V	F	46	4	Multiple	1	6	4	3	4	2
2016-08-11 20:41:14	V				4	Multiple	2	7	4	4	3	1
2016-08-12 20:41:14	V				4	Multiple	3	6	3	2	3	2
2016-08-13 20:41:14	V				4	Single	4	7	4	3	2	2
2016-08-14 20:41:14	V	S A	F	56	5	Multiple	1	6	5	4	5	2
2016-08-15 20:41:14	V				5	Multiple	2	7	5	5	3	2
2016-08-16 20:41:14	V				5	Multiple	3	6	5	4	5	4
2016-08-17 20:41:14	V				5	Single	4	6	4	2	4	2
2016-08-18 20:41:14	V				5	Single	5	5	4	3	4	2
2016-08-19 20:41:14	V	M G	M	34	6	Multiple	1	7	5	5	3	2
2016-08-20 20:41:14	V				6	Multiple	2	7	5	4	5	2
2016-08-21 20:41:14	V				6	Multiple	3	7	5	5	3	3
2016-08-22 20:41:14	V				6	Multiple	4	8	5	4	5	2
2016-08-23 20:41:14	V				6	Single	5	6	4	2	4	1
2016-08-24 20:41:14	V				6	Single	6	5	5	3	5	1
2016-08-25 20:41:14	V	P N	M	25	3	Multiple	1	7	4	4	3	1
2016-08-26 20:41:14	V				3	Multiple	2	7	5	4	2	2
2016-08-27 20:41:14	V				3	Multiple	3	6	5	4	3	5
2016-08-28 20:41:14	V	S S	M	41	4	Single	1	5	4	3	4	1
2016-08-29 20:41:14	V				4	Single	2	5	5	2	5	1
2016-08-30 20:41:14	V				4	Single	3	6	4	3	4	1
2016-08-31 20:41:14	V				4	Single	4	5	4	4	1	1
2016-09-01 20:41:14	V	A C	M	19	4	Multiple	1	6	5	3	5	2
2016-09-02 20:41:14	V				4	Multiple	2	5	5	3	5	4
2016-09-03 20:41:14	V				4	Single	3	6	5	3	3	2
2016-09-04 20:41:14	V				4	Single	4	6	4	3	4	3
2016-07-05 21:11:24	VAM	S B	M	24	5	Multiple	1	5	3	1	3	2
2016-07-06 21:11:24	VAM				5	Multiple	2	6	3	2	3	1
2016-07-07 21:11:24	VAM				5	Multiple	3	5	2	2	2	1
2016-07-08 21:11:24	VAM				5	Single	4	5	2	1	2	1
2016-07-09 21:11:24	VAM				5	Single	5	6	2	2	2	1
2016-07-10 21:11:24	VAM	C R	F	27	6	Multiple	1	7	2	1	2	1
2016-07-11 21:11:24	VAM				6	Multiple	2	5	2	2	1	2
2016-07-12 21:11:24	VAM				6	Multiple	3	6	2	1	1	2
2016-07-13 21:11:24	VAM				6	Single	4	6	2	1	2	2
2016-07-14 21:11:24	VAM				6	Single	5	6	2	2	2	1
2016-07-15 21:11:24	VAM				6	Multiple	6	5	2	2	2	1
2016-07-16 21:11:24	VAM	G C	F	39	5	Single	1	5	2	1	2	1
2016-07-17 21:11:24	VAM				5	Multiple	2	6	3	3	1	1
2016-07-18 21:11:24	VAM				5	Multiple	3	6	3	1	2	3
2016-07-19 21:11:24	VAM				5	Multiple	4	7	2	1	2	2
2016-07-20 21:11:24	VAM				5	Single	5	6	2	2	1	1
2016-07-21 21:11:24	VAM	F F	M	52	4	Single	1	6	2	2	2	1
2016-07-22 21:11:24	VAM				4	Multiple	2	5	3	1	3	1
2016-07-23 21:11:24	VAM				4	Multiple	3	6	2	2	1	1
2016-07-24 21:11:24	VAM				4	Single	4	5	3	3	2	1
2016-07-25 21:11:24	VAM	S A	F	43	6	Single	1	7	2	2	1	2
2016-07-26 21:11:24	VAM				6	Single	2	6	3	3	1	2
2016-07-27 21:11:24	VAM				6	Single	3	6	2	2	2	1
2016-07-28 21:11:24	VAM				6	Single	4	8	2	1	2	1
2016-07-29 21:11:24	VAM				6	Single	5	5	2	1	2	2
2016-07-30 21:11:24	VAM				6	Multiple	6	6	3	3	1	2
2016-07-31 21:11:24	VAM	S V	M	36	3	Multiple	1	6	2	1	2	1
2016-08-01 21:11:24	VAM				3	Single	2	6	2	2	2	1
2016-08-02 21:11:24	VAM				3	Single	3	6	2	1	2	2
2016-08-03 21:11:24	VAM	T M	M	31	4	Single	1	6	1	1	1	1
2016-08-04 21:11:24	VAM				4	Single	2	8	3	3	1	1
2016-08-05 21:11:24	VAM				4	Single	3	5	2	2	1	1
2016-08-06 21:11:24	VAM				4	Multiple	4	6	2	2	1	1
2016-08-07 21:11:24	VAM	L F	F	26	4	Multiple	1	5	2	1	2	1
2016-08-08 21:11:24	VAM				4	Single	2	5	3	1	3	1
2016-08-10 21:11:24	VAM				4	Single	3	6	2	1	2	1
2016-08-11 21:11:24	VAM			45	4	Single	4	5	2	1	1	2
2016-08-12 21:11:24	VAM	M M	F		3	Multiple	1	6	2	1	1	1
2016-08-13 21:11:24	VAM				3	Single	2	7	3	2	3	1
2016-08-14 21:11:24	VAM				3	Single	3	6	2	2	1	1
2016-08-15 21:11:24	VAM	A C	F	46	3	Multiple	1	7	2	2	1	1
2016-08-16 21:11:24	VAM				3	Single	2	7	2	1	2	1
2016-08-17 21:11:24	VAM				3	Single	3	8	2	1	2	1
2016-07-02 19:58:36	VM	S T	M	51	4	Multiple	1	6	5	5	2	1
2016-07-03 19:58:36	VM				4	Single	2	7	5	5	3	2
2016-07-04 19:58:36	VM				4	Single	3	8	5	3	3	5
2016-07-05 19:58:36	VM				4	Multiple	4	7	5	3	5	4
2016-07-06 19:58:36	VM	L C	F	28	5	Single	1	5	5	5	2	3
2016-07-07 19:58:36	VM				5	Multiple	2	7	5	5	2	2
2016-07-08 19:58:36	VM				5	Multiple	3	8	4	2	1	4
2016-07-09 19:58:36	VM				5	Single	4	6	5	5	2	3
2016-07-10 19:58:36	VM				5	Single	5	5	4	3	4	1
2016-07-11 19:58:36	VM	S R	M	61	4	Single	1	6	5	5	3	3
2016-07-12 19:58:36	VM				4	Single	2	5	5	4	5	3
2016-07-13 19:58:36	VM				4	Multiple	3	6	5	3	5	4
2016-07-14 19:58:36	VM				4	Single	4	8	5	5	4	5
2016-07-15 19:58:36	VM	L C	M	33	5	Multiple	1	7	5	4	5	2
2016-07-16 19:58:36	VM				5	Multiple	2	7	5	4	5	3
2016-07-17 19:58:36	VM				5	Single	3	6	5	5	5	5
2016-07-18 19:58:36	VM				5	Single	4	7	4	4	3	2
2016-07-19 19:58:36	VM				5	Single	5	8	3	3	2	1
2016-07-20 19:58:36	VM	S E	F	56	4	Single	1	6	4	3	4	2
2016-07-21 19:58:36	VM				4	Multiple	2	6	5	3	4	5
2016-07-22 19:58:36	VM				4	Single	3	7	5	4	3	5
2016-07-23 19:58:36	VM				4	Single	4	6	4	4	4	2
2016-07-24 19:58:36	VM	L Z	M	42	6	Multiple	1	8	4	3	4	3
2016-07-25 19:58:36	VM				6	Single	2	7	4	4	4	3
2016-07-26 19:58:36	VM				6	Single	3	6	5	5	3	2
2016-07-27 19:58:36	VM				6	Single	4	6	4	3	4	2
2016-07-28 19:58:36	VM				6	Multiple	5	8	5	4	5	1
2016-07-29 19:58:36	VM				6	Single	6	7	3	3	2	1
2016-07-30 19:58:36	VM	O M	F	28	4	Multiple	1	6	5	4	5	2
2016-07-31 19:58:36	VM				4	Single	2	8	5	3	4	1
2016-08-01 19:58:36	VM				4	Multiple	3	7	4	3	4	2
2016-08-02 19:58:36	VM				4	Single	4	6	5	5	4	3
2016-08-03 19:58:36	VM	V V	M	64	3	Single	1	7	5	5	5	2
2016-08-04 19:58:36	VM				3	Multiple	2	7	5	4	5	3
2016-08-05 19:58:36	VM				3	Single	3	6	5	4	5	2
2016-08-06 19:58:36	VM	F I	F	37	6	Multiple	1	6	4	4	3	2
2016-08-07 19:58:36	VM				6	Multiple	2	6	5	4	5	2
2016-08-08 19:58:36	VM				6	Multiple	3	7	4	3	2	1
2016-08-09 19:58:36	VM				6	Single	4	8	5	4	5	2
2016-08-10 19:58:36	VM				6	Multiple	5	6	5	4	5	3
2016-08-11 19:58:36	VM				6	Single	6	6	4	3	4	2
2016-08-12 19:58:36	VM	S C	F	43	3	Multiple	1	6	3	3	3	2
2016-08-13 19:58:36	VM				3	Single	2	8	4	4	4	3
2016-08-14 19:58:36	VM				3	Single	3	7	5	5	3	2
2016-06-25 08:07:11	AM	L M	F	19	4	Multiple	1	8	3	3	2	1
2016-06-26 08:07:11	AM				4	Multiple	2	9	2	2	1	2
2016-06-27 08:07:11	AM				4	Multiple	3	8	4	3	3	2
2016-06-28 08:07:11	AM				4	Multiple	4	11	2	2	2	1
2016-06-29 08:07:11	AM	S B	M	28	5	Single	1	9	2	2	1	1
2016-06-30 08:07:11	AM				5	Single	2	9	2	1	2	1
2016-07-01 08:07:11	AM				5	Multiple	3	8	2	2	2	1
2016-07-02 08:07:11	AM				5	Single	4	9	2	2	1	1
2016-07-03 08:07:11	AM				5	Multiple	5	10	2	1	2	2
2016-07-04 08:07:11	AM	C M	M	52	6	Multiple	1	11	2	2	2	1
2016-07-05 08:07:11	AM				6	Multiple	2	10	3	2	3	1
2016-07-06 08:07:11	AM				6	Single	3	9	2	1	1	2
2016-07-07 08:07:11	AM				6	Single	4	9	2	2	2	1
2016-07-08 08:07:11	AM				6	Single	5	10	2	2	2	1
2016-07-09 08:07:11	AM				6	Single	6	8	2	2	2	1
2016-07-10 08:07:11	AM	S S	F	35	5	Single	1	8	2	2	2	1
2016-07-11 08:07:11	AM				5	Multiple	2	10	2	2	2	1
2016-07-12 08:07:11	AM				5	Multiple	3	9	2	1	2	1
2016-07-13 08:07:11	AM				5	Multiple	4	10	2	2	1	2
2016-07-14 08:07:11	AM				5	Multiple	5	10	2	2	2	1
2016-07-15 08:07:11	AM	A M	M	61	4	Multiple	1	11	2	1	2	1
2016-07-16 08:07:11	AM				4	Multiple	2	10	2	2	1	1
2016-07-17 08:07:11	AM				4	Single	3	9	2	2	1	2
2016-07-18 08:07:11	AM				4	Multiple	4	10	3	2	3	1
2016-07-19 08:07:11	AM	J P	M	46	3	Multiple	1	8	2	2	2	1
2016-07-20 08:07:11	AM				3	Single	2	10	2	1	1	2
2016-07-21 08:07:11	AM				3	Multiple	3	9	2	2	2	1
2016-07-22 08:07:11	AM	T P	M	42	5	Multiple	1	11	3	2	3	2
2016-07-23 08:07:11	AM				5	Multiple	2	10	2	2	2	1
2016-07-24 08:07:11	AM				5	Single	3	8	2	2	2	1
2016-07-25 08:07:11	AM				5	Single	4	9	2	1	2	1
2016-07-26 08:07:11	AM				5	Multiple	5	11	3	2	3	1
2016-07-27 08:07:11	AM	L B	F	31	3	Multiple	1	10	3	3	2	1
2016-07-28 08:07:11	AM				3	Multiple	2	9	2	1	2	2
2016-07-29 08:07:11	AM				3	Multiple	3	8	2	2	2	2
2016-07-30 08:07:11	AM	M C	F	37	4	Single	1	8	2	2	2	1
2016-07-31 08:07:11	AM				4	Multiple	2	9	2	1	1	2
2016-08-01 08:07:11	AM				4	Multiple	3	8	2	2	2	1
2016-08-02 08:07:11	AM				4	Multiple	4	10	2	2	2	1
2016-08-03 08:07:11	AM	L A	F	44	5	Multiple	1	9	2	1	2	2
2016-08-04 08:07:11	AM				5	Single	2	9	2	1	1	2
2016-08-05 08:07:11	AM				5	Single	3	11	2	2	1	1
2016-08-06 08:07:11	AM				5	Single	4	9	2	2	1	1
2016-08-07 08:07:11	AM				5	Multiple	5	10	2	1	2	1
2016-06-01 09:09:19	AV	F P	F	51	4	Multiple	1	6	2	2	1	1
2016-06-02 09:09:19	AV				4	Multiple	2	6	3	2	3	2
2016-06-03 09:09:19	AV				4	Multiple	3	7	2	2	2	1
2016-06-04 09:09:19	AV				4	Multiple	4	8	3	2	3	2
2016-06-05 09:09:19	AV	R S	F	26	6	Multiple	1	6	2	2	2	1
2016-06-06 09:09:19	AV				6	Single	2	6	2	1	2	1
2016-06-07 09:09:19	AV				6	Single	3	7	2	2	1	1
2016-06-08 09:09:19	AV				6	Single	4	6	2	1	2	1
2016-06-09 09:09:19	AV				6	Single	5	8	2	2	2	1
2016-06-10 09:09:19	AV				6	Single	6	8	2	1	2	1
2016-06-12 09:09:19	AV	L G	F	43	4	Multiple	1	7	2	2	1	2
2016-06-13 09:09:19	AV				4	Multiple	2	7	2	1	2	2
2016-06-14 09:09:19	AV				4	Single	3	7	2	2	1	2
2016-06-15 09:09:19	AV				4	Single	4	7	2	1	2	1
2016-06-18 09:09:19	AV	M L	F	65	5	Multiple	1	7	2	2	1	2
2016-06-22 09:09:19	AV				5	Single	2	6	2	2	1	2
2016-06-23 09:09:19	AV				5	Single	3	7	2	1	2	1
2016-06-24 09:09:19	AV				5	Single	4	6	2	2	1	1
2016-06-25 09:09:19	AV				5	Multiple	5	8	2	2	1	1
2016-06-26 09:09:19	AV	M F	M	23	5	Multiple	1	9	3	2	3	1
2016-06-27 09:09:19	AV				5	Multiple	2	8	2	2	1	1
2016-06-28 09:09:19	AV				5	Multiple	3	8	3	2	2	1
2016-06-29 09:09:19	AV				5	Single	4	6	2	1	2	1
2016-06-30 09:09:19	AV				5	Single	5	7	2	1	2	1
2016-07-01 09:09:19	AV	P G	M	22	3	Multiple	1	6	2	2	2	1
2016-07-02 09:09:19	AV				3	Single	2	8	2	2	2	1
2016-07-03 09:09:19	AV				3	Multiple	3	8	2	1	2	2
2016-07-04 09:09:19	AV	U M	M	19	4	Single	1	7	2	2	1	1
2016-07-05 09:09:19	AV				4	Multiple	2	8	2	2	1	1
2016-07-06 09:09:19	AV				4	Multiple	3	8	2	1	2	1
2016-07-07 09:09:19	AV				4	Single	4	6	2	2	2	1
2016-07-08 09:09:19	AV	F N	M	47	4	Single	1	7	2	1	2	1
2016-07-09 09:09:19	AV				4	Single	2	7	2	1	2	1
2016-07-10 09:09:19	AV				4	Multiple	3	8	3	2	2	1
2016-07-11 09:09:19	AV				4	Single	4	6	2	2	2	1
2016-07-12 09:09:19	AV	S T	F	54	4	Multiple	1	9	2	1	2	2
2016-07-13 09:09:19	AV				4	Single	2	8	2	2	1	1
2016-07-14 09:09:19	AV				4	Single	3	7	2	1	2	1
2016-07-15 09:09:19	AV				4	Multiple	4	8	2	2	1	1
2016-07-16 09:09:19	AV	S S	F	44	4	Multiple	1	7	2	2	1	2
2016-07-17 09:09:19	AV				4	Multiple	2	7	2	1	2	1
2016-07-18 09:09:19	AV				4	Single	3	8	2	2	1	1
2016-07-19 09:09:19	AV				4	Single	4	9	2	2	1	1
